# Supplementary material
Source: Springer Nature journal article supplement (https://mijn.bsl.nl/resource/supplementary/13047_2009_116_MOESM5_ESM.pdf/7110100)
Supplement: MOESM5 [file 7110100]

P  
R  
E  
-  
T  
A  
P  
E

Foot measurements pre-walk

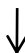

**WALK 10 MINS TREADMILL**

(EMG & Kinematic measurements during walking)

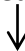

Foot measurements post-walk

## APPLY TAPE

T  
A  
P  
E

Foot measurements pre-walk

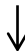

**WALK 10 MINS TREADMILL**

(EMG & Kinematic measurements during walking)

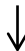

Foot measurements post-walk

## REMOVE TAPE

P  
O  
S  
T  
-  
T  
A  
P  
E

Foot measurements pre-walk

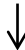

**WALK 10 MINS TREADMILL**

(EMG & Kinematic measurements during walking)

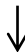

Foot measurements post-walk
